# Supplementary material for: CREB Is Activated by Muscle Injury and Promotes Muscle Regeneration
Source: PLOS journal article supplement (doi:10.1371/journal.pone.0024714), 2011-09-13
Supplement: S8 (10.1371/journal.pone.0024714.s008) [file journal.pone.0024714.s008]

|                                   | <b>Sex</b>  |               | <b>Genotype</b> |                    |                     |
|-----------------------------------|-------------|---------------|-----------------|--------------------|---------------------|
|                                   | <b>Male</b> | <b>Female</b> | <b>+/+</b>      | <b>+/<i>YF</i></b> | <b><i>YF/YF</i></b> |
| <b>Offspring distribution (#)</b> | 71          | 62            | 38              | 55                 | 42                  |
| <b>Expected (#)</b>               | 67          | 67            | 33              | 66                 | 33                  |
| <b>Offspring distribution (%)</b> | 53%         | 47%           | 28%             | 41%                | 32%                 |
| <b>Expected (%)</b>               | 50%         | 50%           | 25%             | 50%                | 25%                 |
| <b>Significance (p)</b>           | 0.8<p<0.9   |               | p>0.8           |                    |                     |

**Table S1.** Sex and genotype data from 20 litters (134 pups) of *Creb*<sup>+/*YF*</sup> heterozygous intercrosses. Two pups of unknown genotype (but known sex) were excluded from genotype summaries. Expected offspring ratios are shown. Chi squared probability tests were applied with 1 (sex) or 2 (genotype) degrees of freedom with continuity correction as appropriate to determine *p* values.
